# Supplementary material for: Longitudinal analyses of the steroid metabolome in obese PCOS girls with weight loss
Source: PubMed Central journal article supplement — Endocr Connect. 2017 Apr 3;6(4):213–24. doi: 10.1530/EC-17-0051 (PMC5435851; doi:10.1530/ec-17-0051), 2017-04-03
Supplement: ec-6-213-t001.pdf [file ec-6-213-t001.pdf]

Supplemental Table 1: changes of steroid hormones, sex hormone binding globulin, gonadotropins, and cardiovascular risk factors depending on weight changes in 20 girls without PCOS

| Variable                        | Weight loss; N=10<br>Age at baseline 14.6 ±0.8 years |                      | p-value <sup>1</sup> | Non weight loss; N=10<br>Age at baseline 14.6 ±1.2 years |                      | p-value <sup>1</sup> | p value <sup>2</sup> |
|---------------------------------|------------------------------------------------------|----------------------|----------------------|----------------------------------------------------------|----------------------|----------------------|----------------------|
|                                 | Baseline                                             | One year later       |                      | baseline                                                 | One year later       |                      |                      |
| BMI [kg/m <sup>2</sup> ]        | 30.8 ±2.2                                            | 25.6 ±1.6            | <0.001               | 30.9 ±3.3                                                | 32.6 ±3.4            | <0.001               | 0.131                |
| BMI-SDS                         | 2.4 ±0.4                                             | 1.6 ±0.3             | <0.001               | 2.3 ±0.5                                                 | 2.5 ±0.5             | 0.004                | 0.290                |
| Waist circumference [cm]        | 101 ±8                                               | 98 ±7                | <0.001               | 105 ±12                                                  | 110 ±11              | <0.001               | 0.446                |
| Triceps skinfold [cm]           | 29 ±5                                                | 23 ±3                | <0.001               | 32 ±6                                                    | 34 ±6                | 0.468                | 0.283                |
| Subscapularis skinfold [cm]     | 28 ±6                                                | 21 ±3                | <0.001               | 31 ±8                                                    | 34 ±6                | 0.144                | 0.581                |
| Body fat* [%]                   | 41 ±5                                                | 32 ±5                | <0.001               | 43 ±9                                                    | 46 ±6                | 0.185                | 0.468                |
| Triglycerides [mg/dl]           | 92 ±61                                               | 83 ±34               | 0.168                | 103 ±45                                                  | 104 ±38              | 0.805                | 0.969                |
| HDL-cholesterol [mg/dl]         | 50 (IQR 44-60)                                       | 62 (43-73)           | 0.049                | 55 (IQR 42-58)                                           | 53 (IQR 38-67)       | 0.611                | 0.939                |
| LDL-cholesterol [mg/dl]         | 82 ±42                                               | 85 ±58               | 0.449                | 107 ±28                                                  | 79 ±44               | 0.084                | 0.130                |
| Fasting glucose [mg/dl]         | 91 ±8                                                | 88 ±7                | 0.226                | 88 ±8                                                    | 89 ±8                | 0.231                | 0.426                |
| Insulin [mU/l]                  | 19 (IQR 11-25)                                       | 15 (IQR 8-16)        | 0.011                | 17 (IQR 7-21)                                            | 15 (IQR 6-22)        | 0.678                | 0.325                |
| HOMA                            | 4.0 (IQR 2.2-6.0)                                    | 3.1 (IQR 1.8-3.8)    | 0.014                | 3.6 (IQR 1.4-5.2)                                        | 3.5 (IQR 0.3-5.1)    | 0.575                | 0.290                |
| Systolic blood pressure [mmHg]  | 116 ±7                                               | 111 ±9               | 0.147                | 119 ±6                                                   | 122 ±10              | 0.234                | 0.356                |
| Diastolic blood pressure [mmHg] | 65 ±9                                                | 61 ±10               | 0.049                | 69 ±9                                                    | 68 ±8                | 0.306                | 0.466                |
| LH [mU/ml]                      | 2.8 (IQR 2.2-3.6)                                    | 3.5 (IQR 1.9-4.3)    | 0.333                | 3.6 (IQR 2.8-4.9)                                        | 3.9 (IQR 2.3-5.0)    | 0.640                | 0.140                |
| FSH [mU/ml]                     | 5.0 (IQR 3.2-5.4)                                    | 4.3 (IQR 3.2-5.8)    | 0.635                | 5.0 (IQR 4.0-6.7)                                        | 4.3 (IQR 1.0-8.6)    | 0.766                | 0.650                |
| LH/FSH                          | 0.7 (IQR 0.5-0.8)                                    | 0.7 (IQR 0.5-1.0)    | 0.646                | 0.7 (IQR 0.6-1.3)                                        | 0.9 (0.5-1.7)        | 0.930                | 0.406                |
| SHBG [nmol/l]                   | 26 (IQR 15-33)                                       | 37 (IQR 27-49)       | 0.012                | 22 (IQR 14-136)                                          | 26 (14-40)           | 0.400                | 0.880                |
| 17 Hydroxpregeneolone [nmol/l]  | 4.8 (IQR 2.2-7.1)                                    | 4.6 (IQR 2.1-6.2)    | 0.539                | 4.2 (IQR 1.8-5.1)                                        | 4.6 (IQR 1.3-5.9)    | 0.575                | 0.690                |
| Progesterone [nmol/l]           | 1.1 (IQR 0.7-1.4)                                    | 1.1 (IQR 0.7-2.7)    | 0.762                | 1.6 (IQR 1.2-2.7)                                        | 1.2 (IQR 0.7-4.7)    | 0.226                | 0.490                |
| 17 Hydroxyprogesterone [nmol/l] | 1.1 (IQR 0.6-1.3)                                    | 1.1 (IQR 0.5-2.3)    | 0.400                | 1.0 (IQR 0.6-1.5)                                        | 0.8 (IQR 0.4-2.5)    | 0.622                | 0.880                |
| DHEA-S [nmol/l]                 | 3968 ±1799                                           | 3479 ±1854           | 0.006                | 2991 ±1018                                               | 2819 ±1261           | 0.451                | 0.151                |
| Androstenedione [nmol/l]        | 3.0 ±0.9                                             | 2.8 ±1.1             | 0.257                | 2.9 ±0.9                                                 | 2.9 ±1.0             | 0.878                | 0.751                |
| Testosterone [nmol/l]           | 0.5 (IQR 0.3-0.9)                                    | 0.4 (IQR 0.2-0.7)    | 0.093                | 0.5 (IQR 0.1-0.6)                                        | 0.4 (IQR 0.2-0.6)    | 0.399                | 0.820                |
| AI*                             | 1.9 (IQR 0.8-4.9)                                    | 1.1 (IQR 0.3-2.0)    | 0.096                | 2.0 (IQR 0.4-3.2)                                        | 1.9 (IQR 0.9-2.3)    | 0.575                | 0.112                |
| E1 [nmol/l]                     | 0.08 (IQR 0.02-0.10)                                 | 0.04 (IQR 0.01-0.05) | 0.613                | 0.07 (IQR 0.01-0.16)                                     | 0.08 (IQR 0.01-0.14) | 0.279                | 0.364                |
| E2 [nmol/l]                     | 0.17 (IQR 0.10-0.21)                                 | 0.15 (IQR 0.07-0.24) | 0.866                | 0.15 (IQR 0.05-0.30)                                     | 0.17 (IQR 0.09-0.27) | 0.900                | 0.821                |
| Deoxycorticosterone [nmol/l]    | 0.01 (IQR 0.01-0.07)                                 | 0.01 (IQR 0.01-0.13) | 0.685                | 0.01 (IQR 0.01-0.03)                                     | 0.01 (IQR 0.01-0.08) | 0.398                | 0.864                |
| 11 Desoxycortisol [nmol/l]      | 0.5 (IQR 0.4-0.9)                                    | 0.5 (IQR 0.3-1.0)    | 0.879                | 0.5 (IQR 0.4-1.0)                                        | 0.4 (IQR 0.2-0.7)    | 0.405                | 0.903                |
| 21 Desoxycortisol [nmol/l]      | 0.5 ±0.4                                             | 0.6 ±0.4             | 0.100                | 0.5 ±0.3                                                 | 0.5 ±0.3             | 0.917                | 0.530                |
| Corticosterone [nmol/l]         | 7.3 (IQR 5.2-13.7)                                   | 3.7 (IQR 2.1-8.3)    | 0.043                | 5.4 (IQR 3.1-8.7)                                        | 4.5 (IQR 1.3-9.3)    | 0.507                | 0.198                |
| Cortisol [nmol/l]               | 257 (IQR 187-358)                                    | 209 (IQR 155-246)    | 0.020                | 238 (IQR 158-285)                                        | 201 (140-307)        | 0.396                | 0.290                |
| Cortison [nmol/l]               | 57 ±8                                                | 59 ±11               | 0.635                | 56 ±13                                                   | 55 ±11               | 0.658                | 0.325                |

Data as mean and standard deviation or median and interquartile range, p-values derived from paired and unpaired t-test as well as Mann Whitney U test and Wilcoxon test; 1: p-value of change within group, 2: p value of baseline comparison of girls with and without weight loss; \*: based on skinfold thickness
